1  
2  
3  
4  
5  
6  
7  
8  
9  
10  
11  
12  
13  
14  
15  
16  
17  
18  
19

**Urban living can rescue Darwin’s finches from the  
lethal effects of invasive vampire flies**

Authors: Sarah A. Knutie<sup>1,2,‡\*</sup>, Cynthia N. Webster<sup>1‡</sup>, Grace J. Vaziri<sup>1</sup>, Lauren Albert<sup>1</sup>,  
Johanna A. Harvey<sup>1,3</sup>, Michelle LaRue<sup>4</sup>, Taylor B. Verrett<sup>1</sup>, Alexandria Soldo<sup>1</sup>,  
Jennifer A.H. Koop<sup>5</sup>, Jaime A. Chaves<sup>6,7</sup>, Jill L. Wegrzyn<sup>1,2</sup>

**Affiliations:**

<sup>1</sup>Department of Ecology and Evolutionary Biology, University of Connecticut, Storrs, CT USA.

<sup>2</sup>Institute for Systems Genomics, University of Connecticut, Storrs, CT USA.

<sup>3</sup>Department of Science and Technology, University of Maryland, College Park, MD USA

<sup>4</sup>School of Earth and Environment, University of Canterbury, NZ

<sup>5</sup>Department of Biological Sciences, Northern Illinois University, DeKalb, IL USA.

<sup>6</sup>Department of Biology, San Francisco State University, San Francisco, CA USA.

<sup>7</sup>Colegio de Ciencias Biológicas y Ambientales, Universidad San Francisco de Quito, Quito,  
Ecuador

\*Corresponding author: [saknutie@gmail.com](mailto:saknutie@gmail.com)

‡co-first authors

## 20 **Abstract**

21 Human activity changes multiple factors in the environment, which can have additive or  
22 neutralizing effects on organisms. However, few studies have explored the causal effects of  
23 multiple anthropogenic factors, such as urbanization and invasive species, on animals, and the  
24 mechanisms that mediate these interactions. This study examines the influence of urbanization  
25 on the detrimental effect of invasive avian vampire flies (*Philornis downsi*) on endemic Darwin's  
26 finches in the Galápagos Islands. We experimentally manipulated nest fly abundance in an urban  
27 and non-urban area and then characterized nestling health, survival, diet, and gene expression  
28 patterns related to host defense. Survival of non-parasitized nestlings from urban (85%) and non-  
29 urban (78%) nests did not differ significantly. However, parasitized, non-urban nestlings lost  
30 more blood and had lower survival (7%) compared to urban nestlings (50%). Stable isotopic  
31 values ( $\delta^{15}\text{N}$ ) from nestling feces revealed that diet differed between urban and non-urban  
32 nestlings.  $\delta^{15}\text{N}$  values correlated negatively with parasite abundance, which suggests that diet  
33 might influence host defenses (e.g., tolerance and resistance). Parasitized urban nestlings  
34 differentially expressed genes within pathways associated with red blood cell production  
35 (tolerance) and pro-inflammatory response (innate immunological resistance), compared to  
36 parasitized non-urban nestlings. In contrast, parasitized non-urban nestlings differentially  
37 expressed genes within pathways associated with immunoglobulin production (adaptive  
38 immunological resistance). Our results suggest that urban nestlings are investing more in pro-  
39 inflammatory responses to resist parasites, but also recovering more blood cells to tolerate blood  
40 loss. Although non-urban nestlings are mounting an adaptive immune response, it is likely a last  
41 effort by the immune system rather than an effective defense against avian vampire flies since  
42 few nestlings survived.

43 **Key words:** Darwin's finch, ecoimmunology, host defenses, gene expression, invasive parasites,  
44 resistance, tolerance, transcriptomics

## 45 **Introduction**

46 Emerging diseases are a major global threat to biodiversity (Daszak et al., 2000; Keesing  
47 et al., 2010). Naïve hosts who cannot effectively defend themselves against novel disease-  
48 causing parasites may risk population declines or even extinction (van Riper III & van Riper,  
49 1986; Frick et al., 2010). However, not all hosts are susceptible to introduced parasites. The  
50 fitness of some host species is clearly reduced, while the fitness of other hosts is relatively  
51 unaffected. Less affected hosts may alleviate parasite damage with defense mechanisms, such as  
52 tolerance and resistance (Read et al., 2008). Tolerance mechanisms, such as tissue repair or  
53 recovery of blood loss due to parasites, minimize the damage that parasites cause without  
54 reducing parasite fitness (Miller et al., 2006; Råberg et al., 2007; Read et al., 2008; Medzhitov et  
55 al., 2012). For example, parents from parasite-infested nests reduce the cost of parasitism by  
56 feeding their offspring more than parents from non-parasitized nests (Christe et al., 1996; Tripet  
57 & Richner, 1997; Knutie et al., 2016). Consequently, despite increasing parasite loads, offspring  
58 do not suffer a high cost of parasitism because they are able to compensate for resources lost to  
59 the parasites.

60 Resistance, as a defense mechanism, minimizes the damage that parasites cause by  
61 reducing parasite fitness (Read et al., 2008). The immune system is an example of a resistance  
62 mechanism that includes the innate and adaptive immune responses. The innate immune  
63 response acts as the front line of defense because it is a rapid, non-specific response to an  
64 antigen. Key innate immune molecules include natural killer cells and signaling proteins (e.g.,  
65 interleukins [IL] and interferons [IFN]). The adaptive immune response is a slower, more  
66 specific, response to antigens but has “memory” and can more rapidly initiate during subsequent  
67 antigen exposure. The key adaptive immune molecules are T helper cells (e.g., CD4+) and B  
68 cells, which are involved in pathways that produce antibodies (e.g., Ig). Both innate and adaptive

69 immune responses are initiated when a host is bitten by an ectoparasite, such as a nest fly (Owen  
70 et al., 2010). The innate immune response is activated first with the release of pro-inflammatory  
71 cytokines (e.g., IL-6, IL-1 $\beta$ , and IL-17 involved in the Th1-directed pathway, IL-12, and IFNs).  
72 Helper T lymphocytes (T<sub>H</sub>) of the adaptive immune response then recognize and are activated by  
73 the antigen-MHC complex on these antigen-presenting cells, which then induce the production  
74 of antigen-specific antibodies by B lymphocytes. Phagocytic and granulocytic cells are then  
75 recruited to the wound by T<sub>H</sub> cells, which induce an increase in size or number of normal cells  
76 and fluid at the wound site, causing inflammation. The immune cascade described above can  
77 decrease ectoparasite fitness by causing edema (tissue swelling), which prevents the parasites  
78 from feeding from capillaries, and can damage the parasite's tissue with proteolytic molecules  
79 (Owen et al., 2010). The innate and adaptive host responses to ectoparasites can vary across  
80 individual hosts and populations, which is often affected by environmental factors, such as food  
81 availability (Knutie, 2020).

82       Humans in urban environments can increase food availability and reliability for animals  
83 with the establishment of wild animal feeders or the impartial disposal of human trash. Due to  
84 the high energetic cost of defense mechanisms, only hosts with sufficient food resources, such as  
85 in these urban areas, may be able to invest in defenses (Sheldon & Verhulst, 1996; Svensson et  
86 al., 1998; Lochmiller & Deerenberg, 2000; Sternberg et al., 2012; Cornet et al., 2014; Howick &  
87 Lazzaro, 2014; Knutie, 2020). These extra nutrients, such as protein, can directly increase the  
88 production of immune cells (Coop & Kyriazakis, 2001; Strandin et al., 2018). Consequently,  
89 individuals with less effective defenses, but better access to resources, might be better equipped  
90 to resist the negative effects of parasites. Alternatively, the lower nutritional quality of the  
91 human-supplemented food could decrease the hosts' ability to produce an effective immune  
92 response to parasites. Without the development or evolution of resistance and tolerance defenses,

93 hosts can face a reduction in population size or even extinction and this effect might be  
94 especially apparent in the context of human-influenced environments (van Riper III & van Riper,  
95 1986; Atkinson & Lapointe, 2009). Understanding the effects of these complex, non-mutually  
96 exclusive interactions is critical because the movement of parasites around the world is only  
97 increasing, and the urban ecosystem is one of the few that is rapidly expanding (Birch &  
98 Wachter, 2011; Verrelli et al., 2022).

99         The effects of urbanization on host defenses against parasites might be particularly  
100 pronounced on islands where population sizes are small, genetic diversity is relatively low, and  
101 where species have evolved in the absence of introduced parasites (e.g., Hawaiian honeycreepers  
102 and malaria; Atkinson & Lapointe, 2009). The Galápagos Islands of Ecuador are relatively  
103 pristine but face increasing changes as a result of a growing human presence. Ecotourism and the  
104 permanent resident human population have grown exponentially in the Galápagos over several  
105 decades with nearly 225,000 visiting tourists each year and 30,000 permanent residents (Walsh  
106 & Mena, 2016). The introduction of parasites to the Galápagos is also relatively recent, such as  
107 the avian vampire fly (*Philornis downsi*), which was introduced within the past few decades.  
108 This nest fly dramatically reduces nestling survival of endemic Darwin's finches, and in some  
109 years, can cause up to 100% mortality (Koop et al., 2013, O'Connor et al., 2014). Compared to  
110 non-urban areas, finches have higher fledging success in urban areas (Harvey et al., 2021), which  
111 is likely related to food availability (De León et al., 2018). Because food availability can alter the  
112 host's ability to defend themselves against parasites (Knutie 2020), urban areas could amplify or  
113 dampen host defense strategies against this parasitic fly.

114         This study examines the effect of urbanization on the interactions between Darwin's  
115 finches and invasive avian vampire flies. For our first objective, we investigated whether the  
116 effect of the flies on finch nestlings differed in an urban and non-urban area. We experimentally

117 removed vampire flies from or allowed for natural parasitism in the nests of small ground finches  
118 (*Geospiza fuliginosa*; a species of Darwin's finch) in an urban (Puerto Baquerizo Moreno) and  
119 non-urban area (Jardín de las Opuntias) on San Cristóbal Island, Galápagos. We then quantified  
120 nestling morphometrics, blood loss, and survival in response to parasitism across treatments and  
121 locations. Relative diets were compared between urban and non-urban nestlings using stable  
122 isotope analyses of feces ( $\delta^{13}\text{C}$ ,  $\delta^{15}\text{N}$ , and C:N). Stable isotope analyses of adult flies were also  
123 conducted to determine whether nestling diet had lasting effects on the flies into adulthood.  
124 Because urban birds have better access to resources, which could positively affect immune  
125 development, we expect that urban finches will be more resistant to vampire flies than non-urban  
126 birds. Urban nestlings with better access to resources might also be able to recover blood loss the  
127 parasites more efficiently and thus be more tolerant to parasitism. However, because urban birds  
128 prefer human junk food (De León et al., 2018), which lacks many nutritional qualities required  
129 for an active immune system, urban nestlings might not be well defended against the parasite.  
130 Spatial variation of urban parasite abundance was also examined to determine whether parasite  
131 load had spatial structure within the town or was associated with various environmental features  
132 (e.g., restaurants).

133 Our second objective examined the molecular mechanisms that underlie the defense  
134 response to flies in urban and non-urban nestlings. We characterized gene expression in the  
135 blood of ~8 day old nestlings across parasite treatments and locations. Gene expression is the  
136 process in which gene information is turned into a functional product, which can affect  
137 phenotypes. For example, nestlings might have more relative expression of genes in a pathway  
138 that affects erythrocyte production, which could account for higher tolerance to flies. Co-  
139 expression profiles were also used to compare gene expression with organismal traits in the  
140 nestlings. If urban nestlings are better defended against flies, we expect to observe increased

141 expression of genes related to innate and adaptive resistance and/or tolerance to blood loss  
142 compared to non-urban nestlings. Consequently, urban parasitized nestlings are expected to have  
143 better health and survival as compared to non-urban parasitized nestlings. Our study is one of the  
144 first to provide insight into the mechanisms by which urbanization positively or negatively  
145 influences host-parasite interactions.

146

## 147 **Methods**

### 148 *Study system*

149 We conducted our study between February–May 2019 in an urban and non-urban area in  
150 the dry lowland climatic zone of San Cristóbal (557 km<sup>2</sup>) in the Galápagos Islands. The urban  
151 area encompasses the only city on San Cristóbal Island, Puerto Baquerizo Moreno (hereon, urban  
152 area) (-0.9067715°, -89.6061678°). This capital city is the second largest city in the Galápagos  
153 archipelago with a human population of 7,199 (INEC, 2016) and measures 0.79 km<sup>2</sup> (~1.2 km by  
154 0.62 km), which includes tourist and residential areas (Harvey et al., 2021). The urban area is  
155 almost entirely consumed by human infrastructure, which primarily consists of impermeable  
156 concrete or stone surfaces and human built structures, but also includes native plants, such as  
157 matazárno (*Piscidia cathagenensi*), Galápagos acacia (*Acacia rorudiana*), and prickly pear  
158 cactus (*Opuntia megasperma*), and ornamental non-native plants established by humans.

159 The non-urban area is in Jardín de las Opuntias (hereon, non-urban area), which is a  
160 protected Galápagos National Park site located eight km southeast of the urban area (-  
161 0.9491651°, -89.5528454°). Our non-urban study area measured 0.21 km<sup>2</sup> and covered 1.4 km of  
162 the main trail and 0.15 km to each side (Harvey et al., 2021). The non-urban location did not  
163 contain any unnatural, human-built impermeable surfaces, and includes native plants, such as  
164 matazárno, acacia, and cacti. The non-urban area receives very low human visitation due to the



165 difficult terrain; however, local residents occasionally transect through the location to access the  
166 beach.

167 Small ground finches commonly nest in both the urban and non-urban area, generally  
168 between February–May (Harvey et al., 2021). Finches build their nests in matazárno, acacia, and  
169 cacti in both locations, but urban finches occasionally nest in human built structures such as  
170 gutters and building signs. Finches use coarse grasses and small twigs to build the outer structure  
171 of the nest, and finer, softer grasses and plants to construct the inner layer and nest liner. In urban  
172 areas, finches frequently incorporate trash and human hair into the construction of their nests  
173 (Theodosopoulos & Gotanda 2018, Harvey et al., 2021). San Cristóbal small ground finches  
174 produce clutches between 1-5 eggs and females incubate the eggs for around 15 days (Harvey et  
175 al., 2021). After hatching, nestlings fledge when they are 12-16 days old. Although females are  
176 primarily involved in parental care, both males and females feed nestlings via regurgitation.

177

#### 178 *Nest parasite manipulation*

179 Both field sites were searched daily or every other day for evidence of nest-building  
180 activity by small ground finches. Once a nest was located, it was checked every other day until  
181 eggs were laid in the nest. To check the nests, we used a small camera (Contour LLC), attached  
182 to an extendable pole, which transmitted video (via Bluetooth) to an iPhone.

183 Since avian vampire flies can lay their eggs during the finches' egg incubation stage, the  
184 nests were assigned to a control (naturally parasitized) or experimental (parasites removed)  
185 treatment after a full clutch of finch eggs was laid. We applied a 1% solution of controlled-  
186 release permethrin (Permacap: BASF Pest Control Solutions) to experimental nests and water to  
187 control nests. Permethrin has been used extensively by Galápagos researchers to experimentally  
188 remove vampire flies from nests (Fessl et al., 2006; Koop et al. 2013a, 2013b; Knutie et al.,

189 2014; Kleindorfer & Dudaniec, 2016; Knutie et al., 2016; McNew et al., 2019; Adesso et al.,  
190 2020) and is approved for use by the Galápagos National Park. We treated nests twice with their  
191 respective treatments: 1) during the egg stage, and 2) when nestlings hatched. During the first  
192 treatment, 3 mL of treatment was injected beneath the nest liner with a sterile blunt syringe.  
193 During the second treatment, the nest liner and nestlings were removed from the nest and the  
194 treatment was applied by spraying the treatment (10 times) into the base of the nest with a travel-  
195 sized spray bottle. The treatments were applied below the nest liner to ensure that the eggs and  
196 nestlings did not directly contact the treatment. While hatchlings were outside the nest during  
197 nest treatment, they were checked for signs of vampire fly infestation (black or enlarged nares,  
198 blood on legs, wings, or feather pores). The nest liner and nestlings were then returned to the  
199 nest. Julian hatch day and a GPS coordinate were recorded for each nest.

200

#### 201 *Nestling health and sample collection*

202 We returned to the nest when nestlings were 7-8 days old to measure their body mass (to  
203 the nearest 0.1 g) with a portable digital scale balance (Ohaus CL2000) and morphometrics, such  
204 as tarsus, bill length, bill width, and bill depth (to the 0.01 mm) with analog dial calipers from  
205 Avinet. During this visit we opportunistically collected fecal samples from the nestlings. Briefly,  
206 a nestling was held approximately 10 cm over a sterile plastic weigh boat until it defecated (<10  
207 seconds). We then transferred the fecal sac into a sterile 2 mL tube. The fecal sample was  
208 transferred to a 2mL tube and kept at 4°C in a portable insulin refrigerator until we returned from  
209 the field. Samples were stored in a -20°C freezer while in the Galápagos and then transferred to  
210 the University of Connecticut where they were stored at -80°C until processed for stable isotope  
211 analysis.

212 For up to three nestlings per nest, we also collected a small blood sample (<20  $\mu$ L) from  
213 the brachial vein using a 30-gauge sterile needle and heparinized capillary tube. Since nestlings  
214 are being fed upon by a hematophagic ectoparasite, we wanted to collect the smallest blood  
215 sample possible from each nestling. Therefore, we use a blood sample from each nestling within  
216 a nest for a different assay. One sample was used to quantify hemoglobin levels (g/dL) with a  
217 HemoCue® HB +201 portable analyzer (Hemocue America, USA) and one sample was used to  
218 quantify glucose levels (mg/dL) with a glucometer (OneTouch, USA). The third sample of whole  
219 blood was preserved in 180  $\mu$ L of RNAlater; this preserved blood was kept at 4°C in a portable  
220 insulin refrigerator until we returned from the field. The sample was then vortexed and stored at  
221 4°C for 24 h before being placed in a -20°C freezer while in the Galápagos. The samples were  
222 then transported to the University of Connecticut where they were stored at -80°C until extracted  
223 for RNA sequencing.

224 We also banded nestlings with an individually numbered metal band and a unique  
225 combination of three colored bands. When nestlings were approximately 12 days old, we  
226 observed the nest with binoculars from a distance of approximately 5 m to prevent premature  
227 fledging. Successful fledging was confirmed by identifying individual birds once they left the  
228 nest.

229

### 230 *Quantifying parasite abundance*

231 After nestling birds fledged or died, the nest was collected and placed in a sealed, gallon-  
232 sized plastic bag within two days of fledging. Nests were transported from the field and dissected  
233 by hand to collect all stages of vampire flies present in the nest within 8 h. All larvae (1<sup>st</sup>, 2<sup>nd</sup>,  
234 and 3<sup>rd</sup> instars), pupae, and pupal cases were identified and counted to determine total parasite  
235 abundance for each nest. The length and width (0.01 mm) of up to ten pupae were haphazardly

236 measured with digital calipers. These measurements were used to calculate pupal volume ( $V =$   
237  $\pi \cdot [0.5 \cdot \text{width}]^2 \cdot \text{length}$ ). Third instar larvae were placed in ventilated 50 mL Falcon tubes with  
238 their home nest material until pupation. Pupae were also placed in 50 mL Falcon tubes (without  
239 material) until they eclosed and could be identified. Up to ten adult flies were collected and  
240 preserved in 95% ethanol for stable isotope analysis (see below for methods).

241

#### 242 *Stable isotope analyses*

243 We quantified  $\delta^{13}\text{C}$  ( $^{13}\text{C}:^{12}\text{C}$ ),  $\delta^{15}\text{N}$  ( $^{15}\text{N}:^{14}\text{N}$ ), and the carbon to nitrogen (C:N) ratio of  
244 finch feces and adult fly bodies.  $\delta^{13}\text{C}$  helps explain the differences in C4 vs. C3 plants consumed,  
245  $\delta^{15}\text{N}$  helps explain the amount of dietary protein consumed (and infers trophic level), and C:N  
246 helps explain the relative lipid consumption. Stable isotope analysis was used for flies to  
247 examine whether nutritional differences were detectable in the vampire flies parasitizing the  
248 finches. Feces were dried in an oven at 60°C for 24 h. Fly samples were rinsed three times in a  
249 2:1 (vol/vol) chloroform/methanol mixture to remove surface oils, then rinsed with sterile water,  
250 and dried at 60°C for 24 h. After drying, samples were ground to a fine powder using a mortar  
251 and pestle. Up to 1 mg of each dried, homogenized sample was weighed into a tin capsule  
252 (Costech Analytical Technologies, Inc., USA). Capsules were folded and placed into a 96-well  
253 plate, then sent to the University of New Mexico Center for Stable Isotope Ratio Analysis  
254 (SIRA). The samples were run as duplicates on a Thermo Delta V mass spectrometer connected  
255 with a Costech 4010 Elemental Analyzer.

256

#### 257 *Effect of location and landmarks on nesting and parasite abundance*

258 To explore whether location or landmarks (i.e., food markets, bakeries, benches and  
259 restaurants) are associated with parasite abundance and fledging success, we conducted an

260 optimized hotspot analysis in ArcGIS 10.8.1 (ESRI 2020). First, a minimum convex polygon  
261 (MCP) was created to serve as our study area for spatial analysis and included all landmarks  
262 within the urban area. Nesting hotspots were then determined based exclusively on spatial  
263 location of nests (i.e., clusters of finch nests rather than any other features on the landscape),  
264 which resulted in a grid of cells that were characterized as hotspots or not within the MCP-  
265 derived study area. To learn about the characteristics of these nests, the Near Tool was used to  
266 identify and calculate the distance to the nearest landmark for all urban nest locations that were  
267 within the nesting hotspots. Specifically, we were interested in all landmarks associated with  
268 food, which was 190 records of 303 landmarks available. We then extracted the locations of  
269 nests within hotspot locations and reviewed landmark types associated with these nests. Finally,  
270 we conducted hotspot analyses based on parasite load (i.e., is there a hotspot of nest parasites?)  
271 and also based on fledging (i.e., is there a hotspot of fledging success?). The hotspot analysis  
272 uses the Getis Ord-Gi statistic (Getis & Ord, 1992), which determines spatial clusters with either  
273 high or low values for the statistic (Fisher & Getis, 2010), corresponding to hot or cool spots,  
274 respectively.

275

#### 276 *RNA extractions, sequencing, and bioinformatics*

277 Total RNA was extracted from 100  $\mu$ L of the whole blood and RNAlater solution using a  
278 modified Tri-Reagent (Ambion, Invitrogen, USA) and Direct-zol RNA Miniprep Plus Kit (Zymo  
279 Research, USA) protocol (Harvey & Knutie, 2022). The samples were incubated at room  
280 temperature for 2 min and then centrifuged for 1 min at 8,000 x g to lightly pellet the blood.  
281 Preservation fluid (RNAlater, Ambion, Invitrogen, USA) was pipetted off leaving no more than  
282 ~15  $\mu$ L of preservative and 500  $\mu$ L of Tri-Reagent were added along with a sterile 5 mm  
283 stainless steel bead (Thomson, USA) the samples were then vortexed for 30 seconds before

284 adding an additional 500  $\mu\text{L}$  of Tri-Reagent. The sample was then vortexed for 10 min at room  
285 temperature. The phase separation portion of the Tri-Reagent protocol was then followed, and  
286 the upper aqueous phase (500  $\mu\text{L}$ ) was transferred to new microcentrifuge tubes. We then  
287 followed the manufacturer's protocol for the Direct-zol RNA Kit beginning with the RNA  
288 purification step. We eluted total RNA using 50  $\mu\text{L}$  of RNA/DNA free water. We used a 4200  
289 TapeStation and High Sensitivity RNA ScreenTape assays (Agilent, USA) to quantify total RNA  
290 concentration ( $\text{ng}/\mu\text{L}$ ) and RNA integrity numbers ( $\text{RIN}^{\text{e}}$ ) (Schroeder et al., 2006). RNA extracts  
291 were then stored at  $-80^{\circ}\text{C}$  until sequencing. The mean RNA concentration was  $74.62 \text{ ng}/\mu\text{L}$   
292 (range: 15.2-246.0) and mean  $\text{RIN}^{\text{e}}$  was 9.33 (range: 7.8-10), with all samples above the  
293 minimum  $\text{RIN}^{\text{e}}$  cutoff (= 7.0) for successful sequencing.

294 A poly-A tail binding bead-based approach was used to reduce ribosomal RNA  
295 contamination. First- and second-strand cDNA was synthesized using the Illumina TruSeq  
296 Stranded mRNA Sample preparation kit and dual indexing was used to multiplex sequencing of  
297 samples. Library quality was assessed on the Agilent TapeStation D1000 DNA High Sensitivity  
298 assay and quantified using the Qubit 3.0 High Sensitivity dsDNA assay to ensure equimolar  
299 pooling. A total of 42 libraries were sequenced across two (75bp PE) Illumina NextSeq500 High  
300 Output sequencing runs.

301 Quality control was applied to paired-end libraries via Trimmomatic (v.0.39) (minimum  
302 quality score 20 and minimum length 45bp) (Bolger et al., 2014). The trimmed reads were  
303 aligned to the reference genome, *Geospiza fortis* (GeoFor\_1.0, INSDC Assembly  
304 GCA\_000277835.1, Jul 2012), utilizing HISAT2 (v.2.2.1) (Kim et al., 2015). Read counts were  
305 extracted from each alignment file via HTSeq (v.0.13.5) with the published reference annotation  
306 (Anders et al., 2015).

307 Read counts and corresponding treatment and location assignments were imported into  
308 RStudio (Bioconductor), and DESeq2 (v.1.32.0) was used to identify differentially expressed  
309 genes among nestling groups (Soneson et al., 2015; Love et al., 2014). The factorial design with  
310 an interaction term (~location + treatment + location:treatment) compared urban and non-urban  
311 locations and parasite treatments (Fig. S2). *P*-values derived from the Wald test were corrected  
312 for multiple testing using the Benjamini and Hochberg method (Love et al., 2014). We selected  
313 genes with an adjusted *P*-value less than 0.1. Initial functional annotations were imported via  
314 biomaRt (v.2.48.3) with Ensembl (bTaeGut1\_v1.p) (Durinck et al., 2009). An enrichment and  
315 depletion (two-sided hypergeometric test) *immune system process* Gene Ontology (GO)  
316 enrichment analysis was performed on differentially expressed genes of sham-fumigated urban  
317 and non-urban nestlings to predict potential immune function pathways. *Taeniopygia guttata*  
318 (zebra finch) GO annotations were sourced from UniProt GOA and referenced within ClueGO  
319 (v.2.5.9) and CluePedia (v.1.5.9), plug-ins for Cytoscape (v.3.8.2) (Shannon et al., 2003; Bindea  
320 et al., 2009; Bindea et al., 2013). Terms with a *P*-value < 0.1 were considered significantly  
321 enriched.

322 A co-expression analysis was conducted using WGCNA (v.1.71) in RStudio (Langfelder  
323 & Horvath 2008). Binary and quantitative trait information was imported along with normalized  
324 RNA-Seq counts. A soft-thresholding power of six was chosen based on the criterion of  
325 approximate scale-free topology and sample size, and eigengene significance was calculated for  
326 each module. Within Cytoscape, a ClueGO network (referencing zebra finch) was constructed to  
327 visualize key drivers in the context of immune response.

328

329 *Statistical analyses*

330 Statistical analyses on field data (i.e., non-gene expression data) were conducted in R  
331 (2021, v.1.4.1103) and figures were created in Prism (2021, v.9.2.0). All dependent variables  
332 were tested for normality using Shapiro-Wilks tests. If variables did not pass normality ( $P >$   
333  $0.05$ ), they were  $\log_{10}$  transformed to pass normality, as denoted below. Because mass and tarsus  
334 were highly correlated ( $R^2 = 0.74$ ,  $P < 0.0001$ ), we calculated the scaled mass index, which is a  
335 standardized metric of body condition (Peig & Green, 2009). Bill surface area was also  
336 calculated from bill length, width, and depth using a modified equation for the surface area of a  
337 cone (LaBarbera et al., 2017).

338 Linear mixed effects models (LMMs) with nest as a random effect were used to analyze  
339 the effect of location on parasite size, effect of parasite intensity on parasite size, and effect of  
340 Julian hatch day on parasite size. LMMs were used to determine the effect of location, treatment,  
341 and their interaction on scaled mass index, bill shape, hemoglobin levels, and glucose levels,  
342 with nest as a random effect. Nestling age (i.e., days old) and Julian hatch day were included as  
343 covariates when they contributed significantly ( $P < 0.05$ ) to the model (age only: bill shape;  
344 Julian hatch day only: glucose; neither: scaled mass index, hemoglobin levels). LMMs were also  
345 used to determine the effect of location and sample type (nestling feces vs. fly) on  $\delta^{15}\text{N}$ ,  $\delta^{14}\text{C}$ ,  
346 and C:N, with sample replicate as a random effect.

347 Generalized linear models (GLMs) were used to analyze the effect of location on parasite  
348 abundance (Poisson), the effect of location on Julian hatch day (log transformed; Gaussian), the  
349 effect of location and Julian hatch day on brood size (log transformed; Gaussian), and effect of  
350 Julian hatch day on parasite abundance (Poisson). GLMs were also used to determine the effect  
351 of location, treatment, and their interaction on fledging age for the nest (log transformed;  
352 Gaussian). A GLM with binomial errors for proportional data (i.e., a logistic regression) was



353 used to determine the effect of location, treatment, and their interaction on fledging success with  
354 Julian hatch day as a covariate.

355 Analyses were conducted with the lmer function (LMMs) and glm function (GLMs)  
356 using the lme4 package in R (Bates et al., 2015). Probability values were calculated using log-  
357 likelihood ratio tests using the Anova function in the car package (Fox & Weisberg 2019). For  
358 one-way and two-way ANOVAs, we used type II and type III sum of squares, respectively.

359

## 360 **Results**

### 361 *Effect of parasite treatment and urbanization on parasite load*

362 Urban and non-urban finches initiated breeding in early February 2019. The first urban  
363 nests hatched approximately seven days before the first non-urban nest. Although Julian hatch  
364 day was, on average, earlier for urban nests (mean  $\pm$  SE:  $86.24 \pm 3.99$  days) compared to non-  
365 urban nests ( $94.17 \pm 4.07$  days), Julian hatch day did not differ significantly between locations  
366 ( $\chi^2 = 2.23$ ,  $P = 0.14$ ). Furthermore, location, Julian hatch day, and their interaction did not  
367 significantly affect brood size (urban:  $2.66 \pm 0.18$  nestlings,  $n = 38$  nests; non-urban:  $2.87 \pm 0.17$ ,  
368  $n = 30$  nests; location:  $\chi^2 = 0.36$ ,  $P = 0.55$ ; hatch day:  $\chi^2 = 0.77$ ,  $P = 0.38$ ; interaction:  $\chi^2 = 1.09$ ,  
369  $P = 0.30$ ). Eight nests were classified as depredated, either due to direct evidence of depredation  
370 (e.g., body parts found) or because they were likely depredated (e.g., all nestlings disappeared  
371 over a short period of time and prior to the typical fledging window). Three non-urban and five  
372 urban nests were depredated, which were both permethrin-treated (three nests) and water-treated  
373 (five nests).

374 The experimental treatment of nests with a mild insecticide was nearly 100% effective at  
375 removing parasites (Fig. 1A; non-urban:  $n = 13$  nests, urban:  $n = 16$  nests); only one permethrin-  
376 treated urban nest had eight parasites after the treatment. Since one permethrin-treated nest was

377 parasitized, nests from this treatment will be referred to as “fumigated”. Water-treated nests  
378 (hereafter, “sham-fumigated”) were naturally parasitized by 27.00 ( $\pm$  5.20) parasites in the non-  
379 urban area ( $n$  = 17 nests) and 15.95 ( $\pm$  3.15) parasites in the urban area (Fig. 1A;  $n$  = 21 nests).  
380 One water-treated nest disappeared due to predation after the nestlings were banded and  
381 therefore, we could not quantify parasitism. Fourteen of 17 (82.35%) non-urban nests and 17 of  
382 21 (80.95%) urban nests contained at least one parasite. Within the sham-fumigated treatment,  
383 non-urban nests had significantly fewer parasites than urban nests ( $\chi^2$  = 54.49,  $P$  < 0.0001).  
384 Julian hatch day did not significantly predict nest parasite abundance ( $\chi^2$  = 1.58,  $P$  = 0.21).

385         The volume (i.e., size) of 93 pupae from 13 urban nests and 90 pupae from 14 non-urban  
386 nests was calculated for comparison. Parasite size, which is a measure of virulence in  
387 ectoparasites, was larger in urban nests compared to non-urban nests (Fig. 1B;  $\chi^2$  = 5.85,  $P$  =  
388 0.02). Urban parasites were, on average, 26% larger than non-urban parasites (urban: 100.30  $\pm$   
389 7.62 mm<sup>3</sup>, non-urban: 81.61  $\pm$  9.29 mm<sup>3</sup>). This difference was not related to competition among  
390 parasites within the nest because parasite intensity was not related to parasite size ( $\chi^2$  = 0.01,  $P$  =  
391 0.97). Rather, the nest hatch day predicted parasite size, with earlier nests having larger parasites  
392 compared to later nesters (Fig. 1C;  $\chi^2$  = 11.01,  $P$  < 0.001).

393

#### 394 *Effect of location and landmarks on nesting and parasite abundance*

395         Of all urban nests (sham-fumigated and fumigated), one nesting hotspot was identified  
396 within the urban area ( $n$  = 37 total nests;  $n$  = 19 hotspot nests), which was at the airport (Fig. S1).  
397 The hotspot grid resulted in 14 cells (78 m x 78 m) with 90% confidence of being a hotspot, with  
398  $Z$ -scores ranging between 2.90 and 6.02. The remaining cells in the study area were not  
399 identified as significant nesting hot- or cool-spots. Of the 19 nests within the nesting hotspot,  
400 seven contained parasites, and all but one of these was located near a bench. Hotspots were not

401 identified for fledging success, nor did we identify parasite hotspots among sham-fumigated  
402 nests only.

403

#### 404 *Effect of parasitism and urbanization on nestling health*

405 Nestlings from sham-fumigated nests had, on average, lower body condition (i.e., scaled  
406 mass index) than nestlings from fumigated nests (Table S1;  $\chi^2 = 4.01, P = 0.045$ ). Location and  
407 the interaction between location and treatment did not significantly affect body condition  
408 (location:  $\chi^2 = 0.36, P = 0.55$ ; interaction:  $\chi^2 = 2.20, P = 0.14$ ). Treatment and location did not  
409 significantly affect bill surface area (location:  $\chi^2 = 0.13, P = 0.72$ ; treatment:  $\chi^2 = 0.71, P = 0.40$ ).  
410 The interaction between treatment and location had a marginally non-significant effect on bill  
411 surface area ( $\chi^2 = 3.09, P = 0.08$ ); fumigated nestlings from non-urban areas had larger bill  
412 surface area than nestlings from urban areas but the bill surface area for sham-fumigated  
413 nestlings from urban and non-urban nests did not differ significantly. Most nestlings from non-  
414 urban, sham-fumigated nests died before they could be measured; only 13 non-urban nestlings  
415 from six sham-fumigated nests survived to be measured.

416 Location alone did not significantly affect nestling hemoglobin levels (Fig. 2; Table S1;  
417  $\chi^2 = 1.06, P = 0.30$ ). Overall, sham-fumigated nestlings had lower hemoglobin levels than  
418 fumigated nestlings ( $\chi^2 = 18.82, P < 0.0001$ ). The interaction between treatment and location  
419 affected hemoglobin levels ( $\chi^2 = 6.16, P = 0.01$ ), with nestlings from sham-fumigated nests in  
420 the non-urban area having, on average, 32% lower levels than nestlings from the other treatments  
421 (i.e., sham-fumigated urban, fumigated urban, and fumigated non-urban nestlings).

422 Overall, nestlings from fumigated nests had higher glucose levels than nestlings from  
423 sham-fumigated nests (Table S1;  $\chi^2 = 9.75, P = 0.002$ ) and non-urban nestlings had higher  
424 glucose levels than urban nestlings ( $\chi^2 = 6.87, P = 0.009$ ). Additionally, the interaction between

425 treatment and location had an effect on nestling glucose levels ( $\chi^2 = 9.34$ ,  $P = 0.002$ ), with urban  
426 nestlings from fumigated and sham-fumigated nests maintaining similar levels but non-urban  
427 nestlings from fumigated nests having higher levels than sham-fumigated nestlings. Nestlings  
428 from sham-fumigated nests in the non-urban area had, on average, 26% lower glucose levels than  
429 nestlings from the other treatments (i.e., sham-fumigated urban, fumigated urban, and fumigated  
430 non-urban nestlings).

431 Fledging success of urban and non-urban nestlings did not differ significantly ( $\chi^2 = 0.67$ ,  
432  $P = 0.41$ ), but overall, parasitism reduced fledging success (Fig. 1A; Table S1;  $\chi^2 = 44.30$ ,  $P <$   
433  $0.0001$ ). The interaction between treatment and location affected fledging success ( $\chi^2 = 8.28$ ,  $P =$   
434  $0.004$ ); survival of fumigated nestlings did not differ between locations (urban: 85%, non-urban  
435 78%) but survival of sham-fumigated nestlings was lower in non-urban areas (7%), compared to  
436 urban areas (48%). Age at fledging did not differ significantly between treatments ( $\chi^2 = 0.20$ ,  $P =$   
437  $0.66$ ) but differed between locations ( $\chi^2 = 3.71$ ,  $P = 0.05$ ); urban nestlings left the nest  
438 approximately one day later than non-urban nestlings. The interaction between treatment and  
439 location did not significantly affect fledging age ( $\chi^2 = 0.10$ ,  $P = 0.75$ ).

440

#### 441 *Effect of urbanization on finch and parasite diet*

442 Flies were enriched in  $\delta^{15}\text{N}$  compared to nestling feces ( $\chi^2 = 164.94$ ,  $P < 0.0001$ ) and all  
443 urban samples were enriched in  $\delta^{15}\text{N}$  compared to non-urban samples ( $\chi^2 = 108.13$ ,  $P < 0.0001$ ;  
444 Fig. 3A). However, the interaction between sample type and location did not significantly affect  
445  $\delta^{15}\text{N}$  ( $\chi^2 = 0.00$ ,  $P = 0.99$ ). Nest parasite abundance correlated negatively with  $\delta^{15}\text{N}$  values ( $\chi^2 =$   
446  $5.69$ ,  $P = 0.02$ ; Fig. 3B). Nestling feces were enriched in  $\delta^{13}\text{C}$  compared to flies ( $\chi^2 = 11.21$ ,  $P =$   
447  $0.0008$ ). However, location or the interaction between sample type and location did not affect  
448  $\delta^{13}\text{C}$  (location:  $X^2 = 0.43$ ,  $P = 0.51$ ; interaction:  $\chi^2 = 1.16$ ,  $P = 0.28$ ). Nestling feces had a higher

449 carbon to nitrogen ratio (C:N), compared to flies ( $\chi^2 = 21.60, P < 0.0001$ ). However, location and  
450 the interaction between sample type and location did not affect C:N (location:  $\chi^2 = 2.04, P =$   
451  $0.15$ ; interaction:  $\chi^2 = 0.74, P = 0.39$ ).

452

### 453 *Sequencing, Quality Control, and Alignment*

454 In total, 42 paired-end nestling libraries were constructed for nestlings from sham-  
455 fumigated urban nests ( $n = 11$ ), sham-fumigated non-urban nests ( $n = 5$ ), fumigated urban nests  
456 ( $n = 14$ ), and fumigated non-urban nests ( $n = 12$ ). The total paired-reads post-QC ranged  
457 between 15.86 M and 42.16 M and alignment rates against the *Geospiza fortis* genome ranged  
458 from 80.74% to 91.81% (Table S2).

459

### 460 *Differentially Expressed Genes*

461 A pairwise differential expression analysis observing two sites (urban and non-urban) and  
462 two treatments (sham-fumigated and fumigated) with an interaction produced four gene-sets  
463 (File S1). A total of 5,123 genes ( $P\text{-adj} < 0.1$ ) were differentially expressed in sham-fumigated  
464 nestlings across the urban (up-regulated) and non-urban (down-regulated) sites - of which, 2,521  
465 were up-regulated and 2,602 were down-regulated. Altogether, 57 genes demonstrated strong  
466 expression patterns ( $\pm 4$ -fold change), including frizzled class receptor 10 FZD10 (16.20-fold  
467 change), a primary receptor for Wnt signaling, leucine rich repeat and Ig domain containing 3  
468 LINGO3 (5.35-fold change), which has been shown to regulate mucosal tissue regeneration in  
469 humans and promote wound healing, adenosine deaminase ADA (-8.17-fold change), associated  
470 with hemolytic anemia, and hepatic leukemia factor HLF (-5.64-fold change), known to  
471 influence the renewal of hematopoietic stem cells (Wang et al., 2016; Zullo et al., 2021; Chen &  
472 Mitchell, 1994; Komorowska et al., 2017). In fumigated nestlings, only two genes were up-

473 regulated in the urban site, bisphosphoglycerate mutase BPGM (3.23-fold change), a regulator of  
474 erythrocyte metabolism and hemoglobin in red blood cells, and zinc finger protein GLIS1 (3.40-  
475 fold change), which has been significantly associated with bill length (Xu et al., 2020;  
476 Lundregan et al., 2018). There were no significantly down-regulated genes in fumigated urban  
477 nestlings. When comparing sham-fumigated vs. fumigated nestlings in the urban site, a total of  
478 768 genes were differentially expressed - with 570 being up-regulated in sham-fumigated  
479 nestlings, and 198 down-regulated. The vast majority of genes showed moderate fold-change  
480 patterns, with only three exhibiting strong expression patterns: inorganic pyrophosphate transport  
481 regulator ANKH (4.43-fold change), prokineticin 2 PROK2 (4.38-fold change) and plexin A2  
482 PLXNA2 (-4.08-fold change). By comparison, the non-urban site yielded 7,064 genes, 3,709  
483 expressed in sham-fumigated nestlings, and 3,355 in fumigated nestlings. Of those, 314  
484 displayed strong expression patterns, including assembly factor for spindle microtubules ASPM  
485 (7.94-fold change), which has an apparent role in neurogenesis and neuronal development (Nam  
486 et al., 2010) (Fig. S3-S4).

487

#### 488 *Gene enrichment related to host defense mechanisms*

489 Gene enrichment of sham-fumigated nestlings from the urban and non-urban location  
490 was compared to identify potential host defense mechanisms to explain the expression patterns  
491 observed. Analysis of enriched *immune system process* Gene Ontology (GO) terms revealed 21  
492 significant ( $P < 0.05$ ) up-regulated terms (urban) and 12 significant down-regulated terms (non-  
493 urban) categorized by resistance (adaptive and innate) and tolerance (File S2).

494 First, we examined enrichment patterns related to *adaptive immunological resistance*  
495 (Fig. 4A). The sham-fumigated urban nestlings exhibited strong enrichment of lymphocyte  
496 differentiation ( $P < 0.02$ ) and T-cell pathways related to regulation of CD4-positive, alpha-beta T

497 cell activation ( $P < 0.01$ ) and natural killer T-cell differentiation ( $P < 0.05$ ). By comparison,  
498 sham-fumigated non-urban nestlings yielded 21 significant adaptive immunity terms. Of those,  
499 ten terms were related to Ig antibodies, including positive regulation of isotype switching to IgG  
500 isotypes ( $P < 0.001$ ) and somatic hypermutation of immunoglobulin genes ( $P < 0.001$ ). The  
501 other 11 terms were related to B cell proliferation ( $P < 0.01$ ) and activation ( $P < 0.05$ ), leukocyte  
502 differentiation ( $P < 0.04$ ) and proliferation ( $P < 0.05$ ), regulation of antigen receptor-mediated  
503 signaling pathways ( $P < 0.04$ ), and germinal center formation ( $P < 0.01$ ).

504 We next examined enrichment patterns related to *innate immunological resistance* (Fig.  
505 4B). Sham-fumigated urban nestlings were enriched for both type I interferon mediated signaling  
506 ( $P < 0.03$ ) and toll-like receptor 9 signaling ( $P < 0.05$ ). Among the sham-fumigated non-urban  
507 nestlings, only negative regulation of innate immune response ( $P < 0.07$ ) was enriched.

508 Finally, we examined enrichment related to *tolerance* (Fig. 4C). Sham-fumigated urban  
509 nestlings had three significantly enriched terms specific to red blood cells, including erythrocyte  
510 differentiation ( $P < 0.001$ ) and development ( $P < 0.001$ ), as well as enucleate erythrocyte  
511 differentiation ( $P < 0.01$ ). Among non-urban nestlings, regulation of megakaryocyte  
512 differentiation yielded a  $P$ -value less than 0.07.

513

#### 514 *Co-expression Analysis*

515 A differential co-expression analysis was conducted to provide novel insights on other  
516 traits that may explain gene expression patterns in nestling finches. Correlations in transcript  
517 levels across 12 traits (urban, sham-fumigated, hemoglobin concentration, glucose concentration,  
518 survival (“alive”), deltaC, deltaN, C:N, days old, number of parasites in nest, bill surface area,  
519 and scaled mass index) introduced 44 modules (File S3; Fig. S5-S8). Nestling survival (“alive”  
520 trait) presented the most significant correlations across the gene set, as illustrated by module A ( $r$

521 = 0.67,  $P < 0.0001$ ) and module B ( $r = -0.82$ ,  $P < 0.0001$ ) respectively (Fig. 5). From the 2,338  
522 total genes included in module A, 43 yielded 19 significantly enriched *immune system process*  
523 terms related to T-cell activation, lymphocyte differentiation, and negative regulation of  
524 hemopoiesis. Comparatively, 55 of the 3,422 genes in module B activated 21 immune pathways  
525 related to somatic hypermutation of immunoglobulin genes, leukocyte mediated cytotoxicity and  
526 interestingly, erythrocyte differentiation.

527         Apart from mortality, other traits were strongly correlated with module A and B.  
528 Specifically, module A was negatively correlated with parasitism ( $r = -0.59$ ,  $P < 0.0001$ ) and  
529 nest parasite abundance ( $r = -0.74$ ,  $P < 0.0001$ ), and positively correlated with hemoglobin level  
530 ( $r = 0.66$ ,  $P < 0.0001$ ), glucose level ( $r = 0.48$ ,  $P < 0.001$ ), and deltaC ( $r = 0.32$ ,  $P < 0.04$ ).  
531 Specifically, module B was positively correlated with parasitism ( $r = 0.57$ ,  $P < 0.0001$ ) and nest  
532 parasite abundance ( $r = 0.62$ ,  $P < 0.0001$ ), and negatively correlated with hemoglobin level ( $r =$   
533  $-0.52$ ,  $P < 0.0004$ ), glucose level ( $r = -0.55$ ,  $P < 0.0002$ ), deltaC ( $r = -0.34$ ,  $P < 0.03$ ) and scaled  
534 mass ( $r = -0.45$ ,  $P < 0.003$ ). By comparison, although there were no notable correlations to  
535 urbanization in the described modules, the enriched immune pathways better explain patterns of  
536 expression observed in urban and non-urban sham-fumigated finches.

537

## 538 **Discussion**

539         Our study found that urban living partially rescues nestling small ground finches from the  
540 lethal effects of parasitism by invasive avian vampire flies. Survival of sham-fumigated nestlings  
541 did not differ significantly, which suggests that urbanization alone does not affect fledging  
542 success. Urban nests had significantly fewer parasites than non-urban nests, but even highly  
543 parasitized urban nestlings survived. These results indicate that urban nestlings have effective  
544 resistance and tolerance mechanisms to deal with avian vampire flies. Differences in diet



545 (measured using stable isotopes) between locations could explain why urban nestlings are less  
546 affected by parasites, but these results are correlative. Gene expression analyses revealed that  
547 resistance and tolerance mechanisms might underlie differences in parasite effects. Sham-  
548 fumigated urban nestlings differentially expressed genes within pathways associated with red  
549 blood cell production (tolerance) and interferon type 1 activity (innate immunological  
550 resistance), compared to sham-fumigated non-urban nestlings. In contrast, sham-fumigated non-  
551 urban nestlings differentially expressed genes within pathways associated with immunoglobulin  
552 production (adaptive immunological resistance). Both urban and non-urban nestlings expressed  
553 different pathways related to T- and B-cell responses (adaptive immunological resistance).  
554 However, urban nestlings also expressed pathways to downregulate T-cell production, which  
555 might explain why immunoglobulin production genes were less expressed compared to non-  
556 urban nestlings. The gene expression results suggest that non-urban nestlings are investing in  
557 adaptive immunity, but that this type of response is not an effective defense mechanism against  
558 the parasite since few nestlings survived.

559 Overall, our field data suggest that the urban finch population is investing in resistance  
560 over tolerance because urban nests had 40% fewer parasites and higher nestling survival than  
561 non-urban nests. Gene expression profiles showed that urban nestlings differentially express  
562 innate immune genes associated with pro-inflammatory cytokines, specifically type-1 interferons  
563 (IFNs), compared to non-urban nestlings. When larval flies chew through the skin of their hosts,  
564 effective inflammation by the host (thickening the skin and restricting blood flow) can prevent  
565 ectoparasite feeding (reviewed in Owens et al., 2010). Although other avian urbanization studies  
566 have not observed changes in IFNs, they have found other enhanced innate immune responses  
567 within urban populations. For example, Watson et al., (2017) observed overrepresented genes  
568 involved in the secretion and receptor-binding of cytokines in urban great tits (*Parus major*)

569 compared to non-urban tits. Additionally, urban nestling black sparrowhawks (*Accipiter*  
570 *melanoleucus*) had a stronger innate response to an immune challenge compared to non-urban  
571 nestlings (Nwaogu et al., 2023). Although these studies were unable to link the heightened innate  
572 immune response in urban nestlings to parasite resistance, they provide evidence that urban  
573 living could confer an advantage against parasitism.

574 Most studies suggest that IFNs are largely involved in resistance to viruses (Katze et al.,  
575 2002; Fensterl & Sen, 2009). An experimental study (e.g., with avian vampire fly-specific  
576 vaccination challenges) is still needed to determine whether IFNs are specifically involved in the  
577 inflammatory response to avian vampire flies because it is possible that finches are actually  
578 responding to a virus. For example, adult finches in Puerto Baquerizo Moreno, San Cristóbal  
579 Island, are susceptible to infection by the invasive avian pox virus (Lynton-Jenkins et al., 2021).  
580 A recent study suggests that pox-infected adult finches upregulate expression of interferon  
581 pathways (McNew et al., 2022), which could explain the expression of IFN seen in urban sham-  
582 fumigated nestlings. One interesting possibility is that infection by pox could also be conferring  
583 resistance to avian vampire flies. This potential explanation requires further study but could  
584 provide insight into the disease dynamics of co-infecting invasive parasites of Galápagos birds  
585 (Wikelski et al., 2004).

586 Although sham-fumigated non-urban nestlings did not exhibit significantly enriched  
587 innate immune pathways, they did differentially express genes involved in pathways related to  
588 the adaptive immune response. Specifically, T-cell, B-cell, and Ig pathways were expressed, but  
589 without successfully conferring resistance since almost all of the nestlings died. This  
590 upregulation could be the final effort by the finches' immune system to deal with the parasite  
591 before it becomes physiologically costly. In contrast, urban finch nestlings expressed more  
592 adaptive immune pathways related to lymphocyte and T-cell differentiation, compared to non-

593 urban nestlings. One explanation for why urban nestlings had higher survival compared to non-  
594 urban nestlings is that resistance is heightened when the innate and adaptive immune system are  
595 activated simultaneously (Palm & Medzhitov, 2007).

596         Regardless of the mechanism, a central question is why urban finches are more resistant  
597 to avian vampire flies than non-urban finches? Immunological resistance can be conditionally  
598 dependent and only hosts in good condition might be able to resist parasites (Sheldon &  
599 Verhulst, 1996; Svensson et al., 1998; Lochmiller & Deerenberg, 2000; Sternberg et al., 2012;  
600 Cornet et al., 2014; Howick & Lazzaro, 2014; Knutie, 2020). In a native host-parasite system,  
601 eastern bluebirds (*Sialia sialis*) are both tolerant and resistant to nest flies and the investment in  
602 defenses depends on whether supplemental food is available (resistance) or not (tolerance;  
603 Knutie, 2020). Urban areas in the Galápagos provide a reliable source of human food for  
604 animals, including finches (De León et al., 2018). For example, some restaurants have outdoor  
605 dining, where food falls off tables and finches feed on the tables (Fig. S9). Our stable isotope  
606 results corroborate the idea that diet differs between urban and non-urban nestlings. In fact,  
607 higher  $\delta^{15}\text{N}$  values suggest a diet rich in meat, such as chicken, beef, fish, which can be found at  
608 outdoor restaurants in town. Higher  $\delta^{15}\text{N}$  values also correlated with lower parasite abundances,  
609 which supports the idea that diet might influence host defenses. For example, meat has higher  
610 protein concentrations than plants and insects and supplemented protein can increase the  
611 concentration of cellular immune cells (e.g., eosinophils, globule leukocytes and mast cells)  
612 (reviewed in Coop & Kyriazakis, 2001).

613         Some urban nests had 100% nestling survival despite high parasite abundances (up to 48  
614 parasites), indicating that these urban nestlings are tolerant of parasites. Studies have  
615 demonstrated that low finch survival in response to vampire flies is likely related to  
616 exsanguination (i.e., high blood loss) (Koop et al., 2013; Knutie et al., 2016). One explanation

617 for increased tolerance is that urban nestlings have effective blood recovery when parasitized and  
618 thus tolerate parasitism. This hypothesis is corroborated with our results that urban finches have  
619 more hemoglobin (oxygenated blood) when parasitized compared to non-urban birds. Gene  
620 expression profiles suggest that urban nestlings differentially expressed genes within pathways  
621 associated with red blood cell production compared to non-urban nestlings when parasitized.  
622 Furthermore, nestlings that survived had higher gene expression of blood cell production than  
623 nestlings that died, which was observed across urban and non-urban locations. Galápagos  
624 mockingbirds are also relatively tolerant of avian vampire flies (Knutie et al., 2016), but this  
625 tolerance is lost during dry years with low food availability (McNew et al., 2019). The working  
626 hypothesis is that mockingbirds are a larger-bodied species and that larger hosts might be more  
627 tolerant of avian vampire flies (McNew & Clayton, 2018). However, our study suggests that  
628 even smaller-bodied hosts can tolerate avian vampire flies, and there is likely an alternative  
629 explanation. The hormone erythropoietin is produced primarily by the kidneys and works  
630 together with iron to induce erythropoiesis, which is the production of red blood cells. One  
631 explanation for the lack of tolerance in non-urban nestlings is that these nestlings are not  
632 receiving sufficient amounts of iron or are not producing enough erythropoietin. Urban nestlings  
633 have higher  $\delta^{15}\text{N}$  values, which is likely because they are feeding on more iron-rich meat  
634 products, than non-urban birds. Thus, this difference in diet could explain the increased tolerance  
635 related to red blood cell recovery but requires further studies on iron and nestling endocrinology.  
636 Finally, although non-urban nestlings did not exhibit any significantly enriched pathways related  
637 to tolerance, we found that adenosine deaminase (ADA) was significantly up-regulated.  
638 Interestingly, overexpression of this gene in red blood cells has been shown to cause hemolytic  
639 anemia (Chen & Mitchell, 1994), which could be additionally responsible for non-urban finch  
640 mortality.

641           Although survival of urban nestlings in response to parasites is higher than non-urban  
642 nestlings, some nests still failed due to parasitism. Therefore, not all urban finches have effective  
643 defenses against avian vampire flies. Our urban field site is environmentally heterogeneous with  
644 nests found in areas of high tourist activity, residential areas, a naval base, and the airport. Our  
645 spatial analysis did not find any distinct patterns for parasite abundance or fledging success.  
646 Thus, host-parasite dynamics could be related to the small radius (i.e., territory) around the nest,  
647 which might not contribute to a larger spatial pattern. Alternatively, human food type,  
648 abundance, and reliability vary based on tourist activity, which can change weekly depending on  
649 whether cruise ships or other major tours are present. This activity can affect whether restaurants  
650 are open and how much outdoor dining occurs, which can influence food availability for finches.

651           Naïve hosts are thought to lack defenses against novel parasites, which can cause species  
652 declines and extinctions (Daszak et al., 2000; Keesing et al., 2010; Atkinson & Lapointe, 2009).  
653 Over the past decade, studies have found that invasive avian vampire flies can cause up to 100%  
654 mortality in Darwin's finch species across islands in the Galápagos (O'Connor et al., 2010; Koop  
655 et al., 2010; Koop et al., 2013; O'Connor et al., 2014; Kleindorfer & Dudaniec 2016; Knutie et  
656 al., 2016; McNew & Clayton, 2018; Adesso et al., 2021). If humans cannot effectively control  
657 the fly (e.g., Knutie et al., 2014) or host species do not evolve or develop defenses, some species  
658 might even go extinct (Fessl et al., 2010; Koop et al., 2013b). However, our study provides  
659 evidence that urban finches can be relatively well-defended against avian vampire flies. We are  
660 not suggesting that the Galápagos Islands should be urbanized to increase defense against  
661 parasites. Instead, the goal of our study is to demonstrate that some finches can defend  
662 themselves against the flies through various mechanisms, which can provide insight into  
663 management strategies (Ohmer et al., 2021). One next step is to determine whether urban finches  
664 have evolved defenses against the flies, which could be explored with a common garden

665 experiment (Lindström, 1999; Slagsvold et al., 2002; Schluter & Gustafsson, 2006). To  
666 determine whether food availability is responsible for enhanced host defenses, researchers could  
667 manipulate food availability then quantify its effect on finch health and defenses to parasitism.  
668 One method could be to install feeders for adults, who would use the food to feed their nestlings  
669 (Knutie, 2020). However, this method could benefit invasive predators of finches, such as cats or  
670 rats in the area (Phillips et al., 2012; Gotanda, 2021). Alternatively, nestlings could be directly  
671 supplemented with food, which would help control the amount of food provided to the birds.  
672 Overall, the results of our study present a potentially positive future for Darwin's finches in the  
673 face of a virulent invasive parasite and inspires the next step to understanding this dynamic  
674 system.

675

676 **Acknowledgements:** We would like to thank the Galápagos Science Center and the Galápagos  
677 National Park for support. Specifically, we thank Karla Vasco from the Galápagos Science  
678 Center for her assistance and logistical support in the laboratory. We thank Bo Reese for  
679 assistance at the UConn Center for Genomic Innovation and Corrine Arthur for help with field  
680 work. The work was supported by start-up funds and an Institute for Systems Genomics grant  
681 from the University of Connecticut, a National Science Foundation (NSF) Grant (DEB-  
682 1949858), and a National Geographic Grant to SAK, an NSF grant to JW (DBI-1943371), an  
683 Explorers Club Mamont Scholar Grant, an Animal Behavior Society Student Research Grant, a  
684 Whetten Travel award from El Instituto at the University of Connecticut, and a University of  
685 Connecticut Department of Ecology and Evolutionary Biology Zoology 2019 Award to GJV. All  
686 bird handling and work was conducted according to approved University of Connecticut IACUC  
687 (Institutional Animal Care and Use Committee) protocols (No. A17-044). Our work was done

688 under GNP permits PC 28-19 and Genetic Access permit MAE-DNB-CM-2016-0041. Authors  
689 declare that they have no competing interests.

690

691 **Data Availability Statement:** Details of full analysis, including intermediate files and  
692 supporting scripts, are publicly available at: [https://gitlab.com/PlantGenomicsLab/galapagos-](https://gitlab.com/PlantGenomicsLab/galapagos-finch-rna-seq)  
693 [finch-rna-seq](https://gitlab.com/PlantGenomicsLab/galapagos-finch-rna-seq). All raw data are available on FigShare (DOI: available upon acceptance), with  
694 individual-level nestling data in Table S1, and sequences have been uploaded to GenBank  
695 (BioProject accession number: PRJNA930453).

696

697 **Author contributions:** Conceptualization: SAK; Methodology: SAK, CW, GJV, JLW;  
698 Analyses: SAK, CW, GJV, ML, JLW; Investigation: SAK, CW, GJV, LA, CA, TBV, AS, JAH,  
699 JLW; Visualization: SAK, CW, ML, JLW; Funding acquisition: SAK, GJV, JLW; Project  
700 administration: JC, SAK; Supervision: SAK, JLW; Writing – original draft: SAK, CW, GJV,  
701 ML, JLW; Writing – review & editing: All authors.

702

## 703 **Literature Cited**

704 Adesso, A. M., Harvey, J. A., Vaziri, G. J., Verrett, T. B., Albert, L., Arthur, C., ... & Knutie, S.

705 A. (2020). Effect of introduced parasites on the survival and microbiota of nestling cactus  
706 finches (*Geospiza scandens*) in the Galápagos Islands. *Journal of Ornithology*, *161*,  
707 1011-1019.

708 Anders, S., Pyl, P. T., & Huber, W. (2015). HTSeq—a Python framework to work with high-  
709 throughput sequencing data. *Bioinformatics*, *31*(2), 166-169.

710 Langfelder, P., & Horvath, S. (2008). WGCNA: an R package for weighted correlation network  
711 analysis. *BMC bioinformatics*, *9*(1), 1-13.

- 712 Atkinson, C. T., & LaPointe, D. A. (2009). Introduced avian diseases, climate change, and the  
713 future of Hawaiian honeycreepers. *Journal of Avian Medicine and Surgery*, 23(1), 53-63.
- 714 Bates, D., Mächler, M., Bolker, B., & Walker, S. (2014). Fitting linear mixed-effects models  
715 using lme4. *arXiv preprint arXiv:1406.5823*.
- 716 Bindea, G., Mlecnik, B., Hackl, H., Charoentong, P., Tosolini, M., Kirilovsky, A., ... & Galon, J.  
717 (2009). ClueGO: a Cytoscape plug-in to decipher functionally grouped gene ontology and  
718 pathway annotation networks. *Bioinformatics*, 25(8), 1091-1093.
- 719 Bindea, G., Galon, J., & Mlecnik, B. (2013). CluePedia Cytoscape plugin: pathway insights  
720 using integrated experimental and in silico data. *Bioinformatics*, 29(5), 661-663.
- 721 Birch, E. L., & Wachter, S. M. (Eds.). (2011). *Global urbanization*. University of Pennsylvania  
722 Press.
- 723 Bolger, A. M., Lohse, M., & Usadel, B. (2014). Trimmomatic: a flexible trimmer for Illumina  
724 sequence data. *Bioinformatics*, 30(15), 2114-2120.
- 725 Chen, E. H., & Mitchell, B. S. (1994). Hereditary overexpression of adenosine deaminase in  
726 erythrocytes: studies in erythroid cell lines and transgenic mice. *Blood*, 84(7), 2346-2353.
- 727 Christe, P., Richner, H., & Oppliger, A. (1996). Begging, food provisioning, and nestling  
728 competition in great tit broods infested with ectoparasites. *Behavioral Ecology*, 7(2), 127-  
729 131.
- 730 Coop, R. L., & Kyriazakis, I. (2001). Influence of host nutrition on the development and  
731 consequences of nematode parasitism in ruminants. *Trends in Parasitology*, 17(7), 325-  
732 330.
- 733 Cornet, S., Bichet, C., Larcombe, S., Faivre, B., & Sorci, G. (2014). Impact of host nutritional  
734 status on infection dynamics and parasite virulence in a bird-malaria system. *Journal of*  
735 *Animal Ecology*, 83(1), 256-265.



- 736 Danecek, P., Bonfield, J. K., Liddle, J., Marshall, J., Ohan, V., Pollard, M. O., ... & Li, H.  
737 (2021). Twelve years of SAMtools and BCFtools. *Gigascience*, *10*(2), giab008.
- 738 Daszak, P., Cunningham, A. A., & Hyatt, A. D. (2000). Emerging infectious diseases of wildlife-  
739 -threats to biodiversity and human health. *Science*, *287*(5452), 443-449.
- 740 De León, L. F., Sharpe, D. M., Gotanda, K. M., Raeymaekers, J. A., Chaves, J. A., Hendry, A.  
741 P., & Podos, J. (2019). Urbanization erodes niche segregation in Darwin's finches.  
742 *Evolutionary Applications*, *12*(7), 1329-1343.
- 743 Durinck, S., Spellman, P. T., Birney, E., & Huber, W. (2009). Mapping identifiers for the  
744 integration of genomic datasets with the R/Bioconductor package biomaRt. *Nature*  
745 *Protocols*, *4*(8), 1184-1191.
- 746 Esri Inc. (2020). ArcGIS Pro (Version 2.5). Esri Inc. [https://www.esri.com/en-](https://www.esri.com/en-us/arcgis/products/arcgis-pro/overview)  
747 [us/arcgis/products/arcgis-pro/overview](https://www.esri.com/en-us/arcgis/products/arcgis-pro/overview).
- 748 Fensterl, V. and Sen, G.C. 2009. Interferons and viral infections. *BioFactors* 35: 14-20.
- 749 Fessl, B., Sinclair, B. J., & Kleindorfer, S. (2006). The life-cycle of *Philornis downsi* (Diptera:  
750 Muscidae) parasitizing Darwin's finches and its impacts on nestling survival.  
751 *Parasitology*, *133*(6), 739-747.
- 752 Fessl, B., Young, G. H., Young, R. P., Rodríguez-Matamoros, J., Dvorak, M., Tebbich, S., & Fa,  
753 J. E. (2010). How to save the rarest Darwin's finch from extinction: the mangrove finch  
754 on Isabela Island. *Philosophical Transactions of the Royal Society B: Biological*  
755 *Sciences*, *365*(1543), 1019-1030.
- 756 Getis, A., & Ord, J. K. (1992). The analysis of spatial association by use of distance  
757 statistics. *Geographical analysis*, *24*(3), 189-206.
- 758 Fischer, M. M., & Getis, A. (Eds.). (2010). *Handbook of applied spatial analysis: software tools,*  
759 *methods and applications* (pp. 125-134). Berlin: Springer.

- 760 Fox, J., & Weisberg, S. (2019). An {R} companion to applied regression 3rd ed Sage Thousand  
761 Oaks.
- 762 Frick, W. F., Pollock, J. F., Hicks, A. C., Langwig, K. E., Reynolds, D. S., Turner, G. G., ... &  
763 Kunz, T. H. (2010). An emerging disease causes regional population collapse of a  
764 common North American bat species. *Science*, 329(5992), 679-682.
- 765 Getis, A., & Ord, J. K. (1992). The analysis of spatial association by use of distance statistics.  
766 *Geographical Analysis*, 24(3), 189-206.
- 767 Gotanda, K. M. (2020). Human influences on antipredator behaviour in Darwin's finches.  
768 *Journal of Animal Ecology*, 89(2), 614-622.
- 769 Harvey, J. A., Chernicky, K., Simons, S. R., Verrett, T. B., Chaves, J. A., & Knutie, S. A.  
770 (2021). Urban living influences the nesting success of Darwin's finches in the Galápagos  
771 Islands. *Ecology and Evolution*, 11(10), 5038-5048.
- 772 Harvey, J. A., & Knutie, S. A. (2021). Effect of RNA preservation methods on RNA quantity  
773 and quality of field collected avian whole blood. *bioRxiv*, 2021-11.
- 774 Howick, V. M., & Lazzaro, B. P. (2014). Genotype and diet shape resistance and tolerance  
775 across distinct phases of bacterial infection. *BMC evolutionary biology*, 14(1), 1-13.
- 776 Katze, M. G., Y. He, & M. Gale. 2002. Viruses and interferon: a fight for supremacy. *Nature*  
777 *Reviews Immunology*, 2:675–687.
- 778 Keesing, F., Belden, L. K., Daszak, P., Dobson, A., Harvell, C. D., Holt, R. D., ... & Ostfeld, R.  
779 S. (2010). Impacts of biodiversity on the emergence and transmission of infectious  
780 diseases. *Nature*, 468(7324), 647-652.
- 781 Kim, D., Langmead, B., & Salzberg, S. L. (2015). HISAT: a fast spliced aligner with low  
782 memory requirements. *Nature Methods*, 12(4), 357-360.

- 783 Kleindorfer, S., & Dudaniec, R. Y. (2016). Host-parasite ecology, behavior and genetics: a  
784 review of the introduced fly parasite *Philornis downsi* and its Darwin's finch hosts. *BMC*  
785 *Zoology*, *1*(1), 1-19.
- 786 Knutie, S. A., McNew, S. M., Bartlow, A. W., Vargas, D. A., & Clayton, D. H. (2014). Darwin's  
787 finches combat introduced nest parasites with fumigated cotton. *Current Biology*, *24*(9),  
788 R355-R356.
- 789 Knutie, S. A., Owen, J. P., McNew, S. M., Bartlow, A. W., Arriero, E., Herman, J. M., ... &  
790 Clayton, D. H. (2016). Galápagos mockingbirds tolerate introduced parasites that affect  
791 Darwin's finches. *Ecology*, *97*(4), 940-950.
- 792 Knutie, S. A. (2020). Food supplementation affects gut microbiota and immunological resistance  
793 to parasites in a wild bird species. *Journal of Applied Ecology*, *57*(3), 536-547.
- 794 Komorowska, K., Doyle, A., Wahlestedt, M., Subramaniam, A., Debnath, S., Chen, J., ... &  
795 Magnusson, M. (2017). Hepatic leukemia factor maintains quiescence of hematopoietic  
796 stem cells and protects the stem cell pool during regeneration. *Cell Reports*, *21*(12),  
797 3514-3523.
- 798 Koop, J. A., Huber, S. K., Lavery, S. M., & Clayton, D. H. (2011). Experimental demonstration  
799 of the fitness consequences of an introduced parasite of Darwin's finches. *PLoS One*,  
800 *6*(5), e19706.
- 801 Koop, J. A., Owen, J. P., Knutie, S. A., Aguilar, M. A., & Clayton, D. H. (2013). Experimental  
802 demonstration of a parasite-induced immune response in wild birds: Darwin's finches and  
803 introduced nest flies. *Ecology and Evolution*, *3*(8), 2514-2523.
- 804 Koop, J. A., Le Bohec, C., & Clayton, D. H. (2013). Dry year does not reduce invasive parasitic  
805 fly prevalence or abundance in Darwin's finch nests. *Reports in Parasitology*, *3*, 11-17.

- 806 Koop, J. A., Kim, P. S., Knutie, S. A., Adler, F., & Clayton, D. H. (2016). An introduced  
807 parasitic fly may lead to local extinction of Darwin's finch populations. *Journal of*  
808 *Applied Ecology*, 53(2), 511-518.
- 809 LaBarbera, K., Hayes, K. R., Marsh, K. J., & Lacey, E. A. (2017). Complex relationships among  
810 environmental conditions and bill morphology in a generalist songbird. *Evolutionary*  
811 *Ecology*, 31, 707-724.
- 812 Langfelder, P., & Horvath, S. (2008). WGCNA: an R package for weighted correlation network  
813 analysis. *BMC Bioinformatics*, 9(1), 1-13.
- 814 Lindström, J. (1999). Early development and fitness in birds and mammals. *Trends in Ecology*  
815 *and Evolution*, 14(9), 343-348.
- 816 Lochmiller, R. L., & Deerenberg, C. (2000). Trade-offs in evolutionary immunology: just what is  
817 the cost of immunity? *Oikos*, 88(1), 87-98.
- 818 Love, M. I., Huber, W., & Anders, S. (2014). Moderated estimation of fold change and  
819 dispersion for RNA-seq data with DESeq2. *Genome Biology*, 15(12), 1-21.
- 820 Lundregan, S. L., Hagen, I. J., Gohli, J., Niskanen, A. K., Kemppainen, P., Ringsby, T. H., ... &  
821 Jensen, H. (2018). Inferences of genetic architecture of bill morphology in house sparrow  
822 using a high-density SNP array point to a polygenic basis. *Molecular Ecology*, 27(17),  
823 3498-3514.
- 824 Lynton-Jenkins, J. G., Russell, A. F., Chaves, J., & Bonneaud, C. (2021). Avian disease  
825 surveillance on the island of San Cristóbal, Galápagos. *Ecology and Evolution*, 11(24),  
826 18422-18433.
- 827 McNew, S. M., & Clayton, D. H. (2018). Alien invasion: biology of *Philornis* flies highlighting  
828 *Philornis downsi*, an introduced parasite of Galápagos birds. *Annual Review of*  
829 *Entomology*, 63, 369-387.

- 830 McNew, S. M., Knutie, S. A., Goodman, G. B., Theodosopoulos, A., Saulsberry, A., Yépez R, J.,  
831 ... & Clayton, D. H. (2019). Annual environmental variation influences host tolerance to  
832 parasites. *Proceedings of the Royal Society B*, 286(1897), 20190049
- 833 McNew, S. M., Loyola, D. C., Yépez, J., Andreadis, C., Gotanda, K., Saulsberry, A., & Fessl, B.  
834 (2022). Transcriptomic responses of Galápagos finches to avian poxvirus infection.  
835 *Molecular Ecology*, 31(21), 5552-5567.
- 836 Medzhitov, R., Schneider, D. S., & Soares, M. P. (2012). Disease tolerance as a defense strategy.  
837 *Science*, 335(6071), 936-941.
- 838 Miller, M. R., White, A., & Boots, M. (2006). The evolution of parasites in response to tolerance  
839 in their hosts: the good, the bad, and apparent commensalism. *Evolution*, 60(5), 945-956.
- 840 Nam, K., Mugal, C., Nabholz, B., Schielzeth, H., Wolf, J. B., Backström, N., ... & Ellegren, H.  
841 (2010). Molecular evolution of genes in avian genomes. *Genome Biology*, 11(6), 1-17.
- 842 Nwaogu, C. J., Amar, A., Nebel, C., Isaksson, C., Hegemann, A., & Sumasgutner, P. (2023).  
843 Innate immune function and antioxidant capacity of nestlings of an African raptor covary  
844 with the level of urbanisation around breeding territories. *Journal of Animal Ecology*,  
845 92(1), 124-141.
- 846 O'Connor, J. A., Sulloway, F. J., Robertson, J., & Kleindorfer, S. (2010). *Philornis downsi*  
847 parasitism is the primary cause of nestling mortality in the critically endangered Darwin's  
848 medium tree finch (*Camarhynchus pauper*). *Biodiversity and Conservation*, 19(3), 853-  
849 866.
- 850 O'Connor, J. A., Robertson, J., & Kleindorfer, S. (2014). Darwin's finch begging intensity does  
851 not honestly signal need in parasitised nests. *Ethology*, 120(3), 228-237.

- 852 Ohmer, M. E., Costantini, D., Czirják, G. Á., Downs, C. J., Ferguson, L. V., Flies, A., ... &  
853 Cramp, R. L. (2021). Applied ecoimmunology: using immunological tools to improve  
854 conservation efforts in a changing world. *Conservation Physiology*, 9(1), coab074.
- 855 Owen, J. P., Nelson, A. C., & Clayton, D. H. (2010). Ecological immunology of bird-  
856 ectoparasite systems. *Trends in Parasitology*, 26(11), 530-539.
- 857 Palm, N. W., & Medzhitov, R. (2007). Not so fast: adaptive suppression of innate immunity.  
858 *Nature Medicine*, 13(10), 1142-1144.
- 859 Peig, J., & Green, A. J. (2009). New perspectives for estimating body condition from  
860 mass/length data: the scaled mass index as an alternative method. *Oikos*, 118(12), 1883-  
861 1891.
- 862 Phillips, R. B., Wiedenfeld, D. A., & Snell, H. L. (2012). Current status of alien vertebrates in  
863 the Galápagos Islands: invasion history, distribution, and potential impacts. *Biological*  
864 *Invasions*, 14, 461-480.
- 865 Råberg, L., Sim, D., & Read, A. F. (2007). Disentangling genetic variation for resistance and  
866 tolerance to infectious diseases in animals. *Science*, 318(5851), 812-814.
- 867 Read, A. F., Graham, A. L., & Råberg, L. (2008). Animal defenses against infectious agents: is  
868 damage control more important than pathogen control. *PLoS Biology*, 6(12), e1000004.
- 869 Reimand, J., Kull, M., Peterson, H., Hansen, J., & Vilo, J. (2007). g: Profiler—a web-based  
870 toolset for functional profiling of gene lists from large-scale experiments. *Nucleic acids*  
871 *Research*, 35, W193-W200.
- 872 Schluter, D., & Gustafsson, L. (1993). Maternal inheritance of condition and clutch size in the  
873 collared flycatcher. *Evolution*, 47(2), 658-667.

- 874 Schroeder, A., Mueller, O., Stocker, S., Salowsky, R., Leiber, M., Gassmann, M., ... & Ragg, T.  
875 (2006). The RIN: an RNA integrity number for assigning integrity values to RNA  
876 measurements. *BMC Molecular Biology*, 7(1), 1-14.
- 877 Shannon, P., Markiel, A., Ozier, O., Baliga, N. S., Wang, J. T., Ramage, D., Amin, N.,  
878 Schwikowski, B., & Ideker, T. (2003). Cytoscape: a software environment for integrated  
879 models of biomolecular interaction networks. *Genome Research*, 13(11), 2498–2504.
- 880 Sheldon, B. C., & Verhulst, S. (1996). Ecological immunology: costly parasite defences and  
881 trade-offs in evolutionary ecology. *Trends in Ecology and Evolution*, 11(8), 317-321.
- 882 Slagsvold, T., Hansen, B. T., Johannessen, L. E., & Lifjeld, J. T. (2002). Mate choice and  
883 imprinting in birds studied by cross-fostering in the wild. *Proceedings of the Royal  
884 Society of London B: Biological Sciences*, 269(1499), 1449-1455.
- 885 Sonesson, C., Love, M. I., & Robinson, M. D. (2015). Differential analyses for RNA-seq:  
886 transcript-level estimates improve gene-level inferences. *F1000Research*, 4.
- 887 Sternberg, E. D., Lefèvre, T., Li, J., de Castillejo, C. L. F., Li, H., Hunter, M. D., & de Roode, J.  
888 C. (2012). Food plant derived disease tolerance and resistance in a natural butterfly-plant-  
889 parasite interactions. *Evolution*, 66(11), 3367-3376.
- 890 Strandin, T., Babayan, S. A., & Forbes, K. M. (2018). Reviewing the effects of food provisioning  
891 on wildlife immunity. *Philosophical Transactions of the Royal Society B: Biological  
892 Sciences*, 373(1745), 20170088.
- 893 Svensson, E., Råberg, L., Koch, C., & Hasselquist, D. (1998). Energetic stress,  
894 immunosuppression and the costs of an antibody response. *Functional Ecology*, 12(6),  
895 912-919.
- 896 Szklarczyk, D., Gable, A. L., Lyon, D., Junge, A., Wyder, S., Huerta-Cepas, J., ... & Mering, C.  
897 V. (2019). STRING v11: protein–protein association networks with increased coverage,

- 898 supporting functional discovery in genome-wide experimental datasets. *Nucleic acids*  
899 *research*, 47(D1), D607-D613.
- 900 Theodosopoulos, A. N., & Gotanda, K. M. (2018). Death of a Darwin's Finch: a consequence of  
901 human-made debris?. *The Wilson Journal of Ornithology*, 130(4), 1023-1028.
- 902 Tripet, F., & Richner, H. (1997). Host responses to ectoparasites: food compensation by parent  
903 blue tits. *Oikos*, 557-561.
- 904 Van Riper III, C., Van Riper, S. G., Goff, M. L., & Laird, M. (1986). The epizootiology and  
905 ecological significance of malaria in Hawaiian land birds. *Ecological Monographs*, 56(4),  
906 327-344.
- 907 Verrelli, B. C., Alberti, M., Des Roches, S., Harris, N. C., Hendry, A. P., Johnson, M. T., ... &  
908 Ziter, C. (2022). A global horizon scan for urban evolutionary ecology. *Trends in*  
909 *Ecology and Evolution*.
- 910 Walsh, S. J., & Mena, C. F. (2016). Interactions of social, terrestrial, and marine sub-systems in  
911 the Galapagos Islands, Ecuador. *Proceedings of the National Academy of Sciences*,  
912 113(51), 14536-14543.
- 913 Wang, Y., Chang, H., Rattner, A., & Nathans, J. (2016). Frizzled receptors in development and  
914 disease. *Current Topics in Developmental Biology*, 117, 113-139.
- 915 Watson, H., Videvall, E., Andersson, M. N., & Isaksson, C. (2017). Transcriptome analysis of a  
916 wild bird reveals physiological responses to the urban environment. *Scientific Reports*,  
917 7(1), 1-10.
- 918 Wickham, H. (2016). *ggplot2: Elegant graphics for data analysis* Springer Cham.
- 919 Wikelski, M., Foufopoulos, J., Vargas, H., & Snell, H. (2004). Galápagos birds and diseases:  
920 invasive pathogens as threats for island species. *Ecology and Society*, 9(1).



- 921 Xu, G., van Bruggen, R., Gualtieri, C. O., Moradin, N., Fois, A., Vallerand, D., ... & Gros, P.  
922 (2020). Bisphosphoglycerate Mutase Deficiency Protects against Cerebral Malaria and  
923 Severe Malaria-Induced Anemia. *Cell Reports*, 32(12), 108170.
- 924 Zullo, K. M., Douglas, B., Maloney, N. M., Ji, Y., Wei, Y., Herbine, K., ... & Herbert, D. B. R.  
925 (2021). LINGO3 regulates mucosal tissue regeneration and promotes TFF2 dependent  
926 recovery from colitis. *Scandinavian Journal of Gastroenterology*, 56(7), 791-805.
- 927

928 **Figure legends**

929 **Fig. 1. A)** The influence of urbanization on mean ( $\pm$ SE) nest parasite abundance (number of  
930 parasites per nest) and % fledging success. Fledging success did not differ for fumigated nests in  
931 the urban and non-urban area. In sham-fumigated nests, urban nests had on average, fewer  
932 parasites and higher fledging success compared to non-urban nests. Each point represents an  
933 individual nest and darker points indicate higher sample sizes. Diamonds represent the fumigated  
934 treatment and squares represent the sham-fumigated treatment. **B)** Parasite (pupal) volume ( $\text{mm}^3$ )  
935 was larger in the urban area compared to the non-urban area. Each point represents a mean ( $\pm$   
936 SE) volume for a nest. **C)** Parasite volume decreased throughout the nesting season in both  
937 locations. Means and standard error bars are represented in panels A and B.

938 **Fig. 2.** Effect of parasitism and urbanization on mean ( $\pm$ SE) blood loss (hemoglobin) in nestling  
939 finches. Nestlings from sham-fumigated nests had lower hemoglobin levels than nestlings from  
940 fumigated nests. Non-urban nestlings from sham-fumigated nests had lower hemoglobin levels  
941 than nestlings from the other treatments and locations.

942 **Fig. 3. A)** Mean ( $\pm$ SE)  $\delta^{15}\text{N}$  and  $\delta^{13}\text{C}$  values of nestlings and flies in the urban and non-urban  
943 area. Urban individuals were enriched with  $\delta^{15}\text{N}$  compared to non-urban individuals. Overall,  
944 flies were enriched with  $\delta^{15}\text{N}$  compared to nestlings and nestlings were enriched with  $\delta^{13}\text{C}$   
945 compared to flies. **B)** Nest parasite abundance (number of parasites per nest) was correlated  
946 negatively with  $\delta^{15}\text{N}$  values. Each point represents an individual.

947 **Fig. 4. *Immune system process*** Gene Ontology enrichment analysis of sham-fumigated urban  
948 (up-regulated) and non-urban (down-regulated) differentially expressed genes utilizing ClueGO.

949 A) Adaptive Immune Response functional categories shown in purple were partitioned into  
950 seven sub-categories: B Cell, Ig Antibodies, Leukocyte, Receptor, Structure, T Cell and Other.

951 (B) Innate Immune Response categories, shown in red, were divided into four sub-categories:

952 Lymphocyte, Pattern Recognition, Pro-Inflammatory and Other. (C) Tolerance categories, shown  
953 in orange, were split into two sub-categories: Erythrocyte and Hematopoietic. Log<sub>10</sub> (*P*-value)  
954 significance of unique and shared terms is depicted a color saturation gradient (\*\* = *P*-value <  
955 0.05), and number of genes supporting each ontology term is represented by circle size.

956 **Fig. 5.** *Immune system process* Gene Ontology enrichment network of co-expression module A  
957 (top) and B (bottom). WGCNA trait correlation is depicted on a scale from 0 (white) to 1 (red),  
958 and negative trait correlation significance from 0 (white) to -1 (blue). WGCNA *P*-values are  
959 shown in parentheses. The co-expressed genes are represented with ClueGO in pathway form.  
960 The significance of enriched Gene Ontology terms is represented by the gray gradient. The size  
961 of the circle represents the number of genes associated with the enriched term.

962

963 Fig 1.

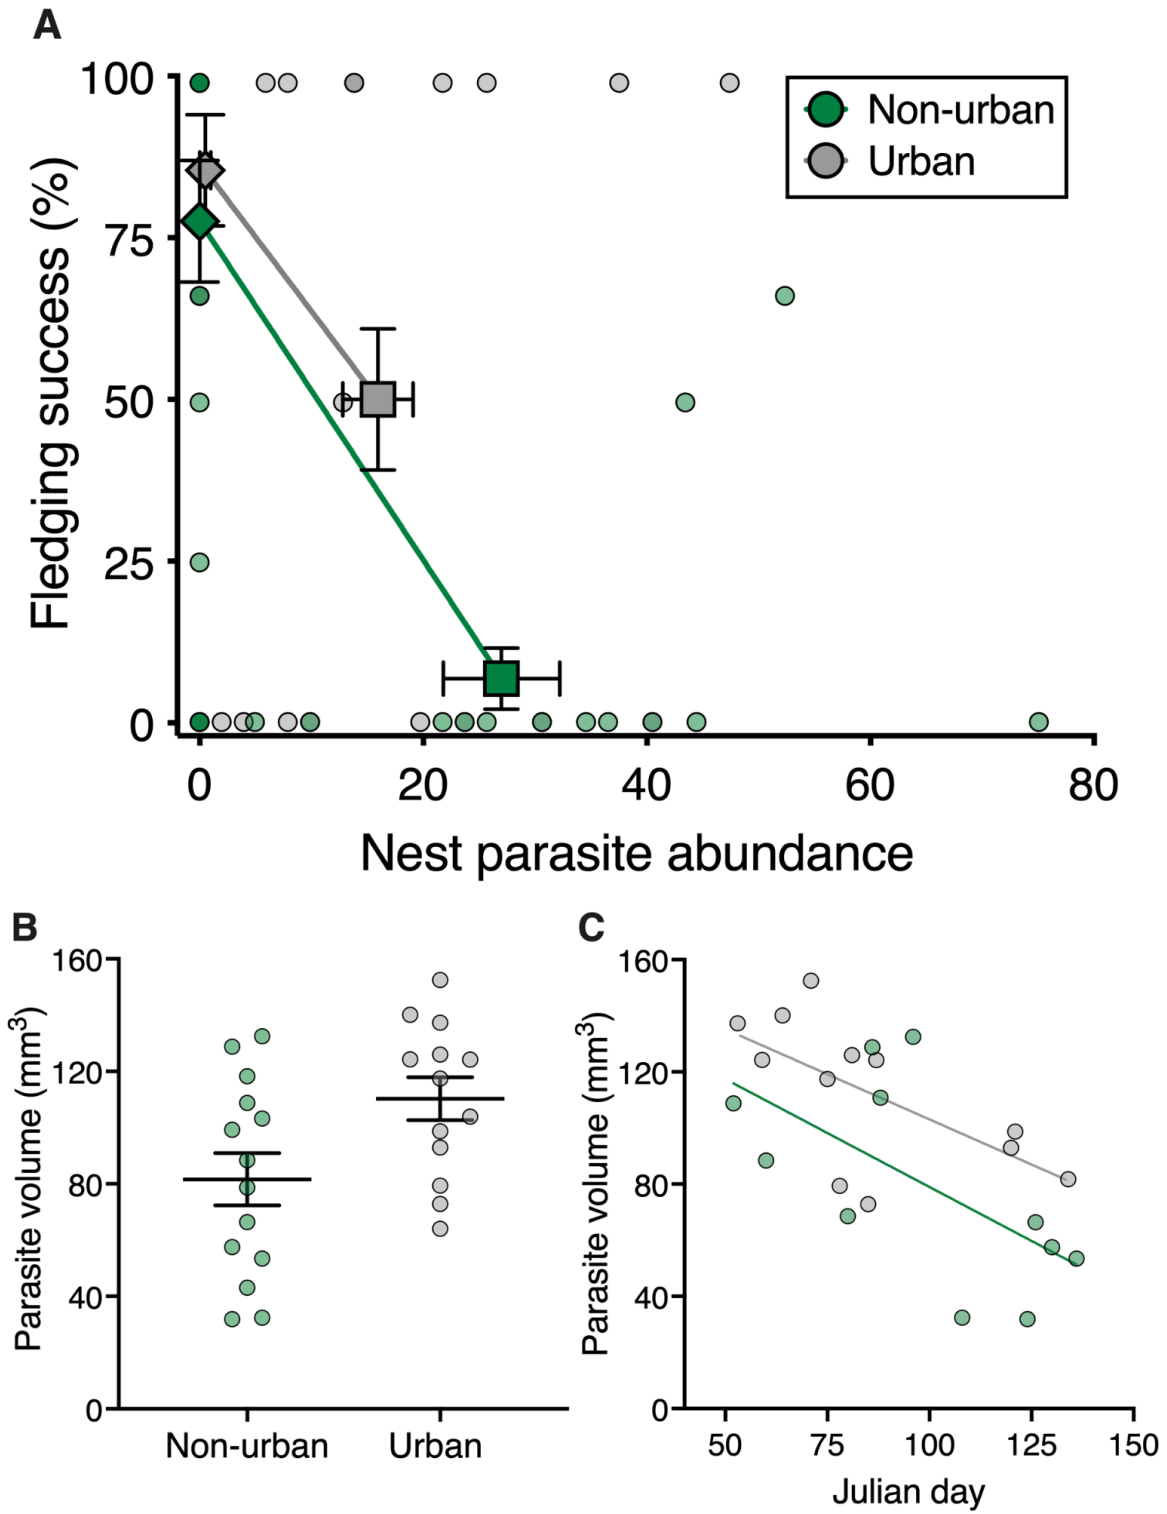

964

965 **Fig. 2.**

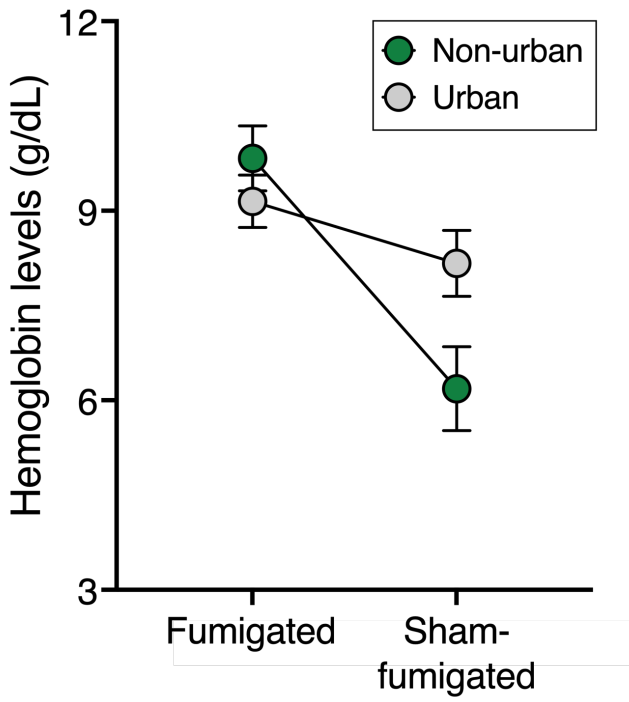

966

967

968 **Fig. 3.**

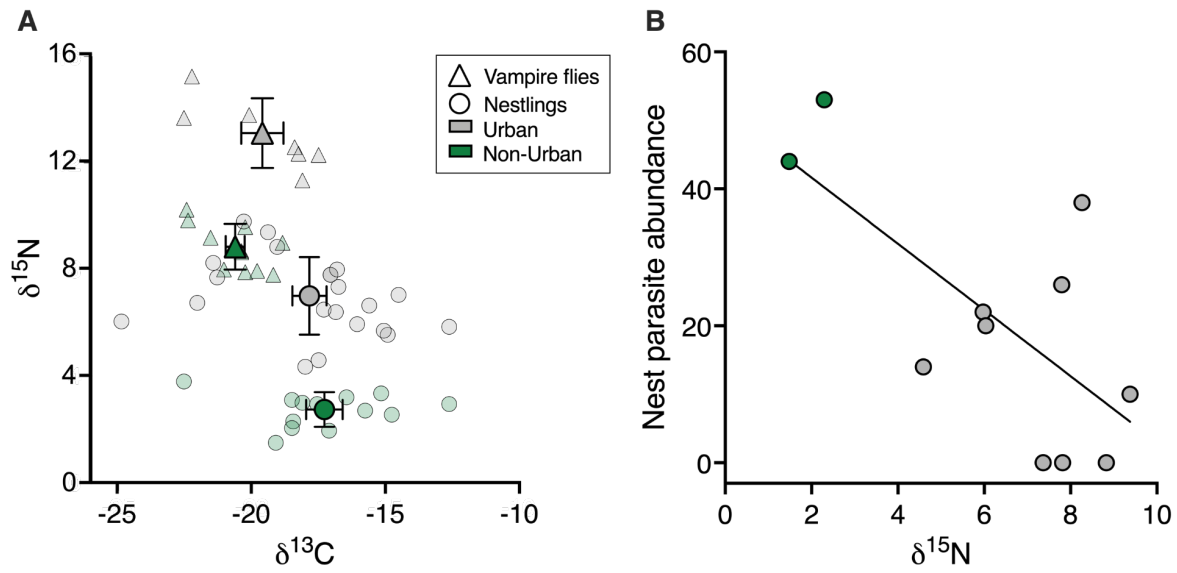

969

970 **Fig. 4.**

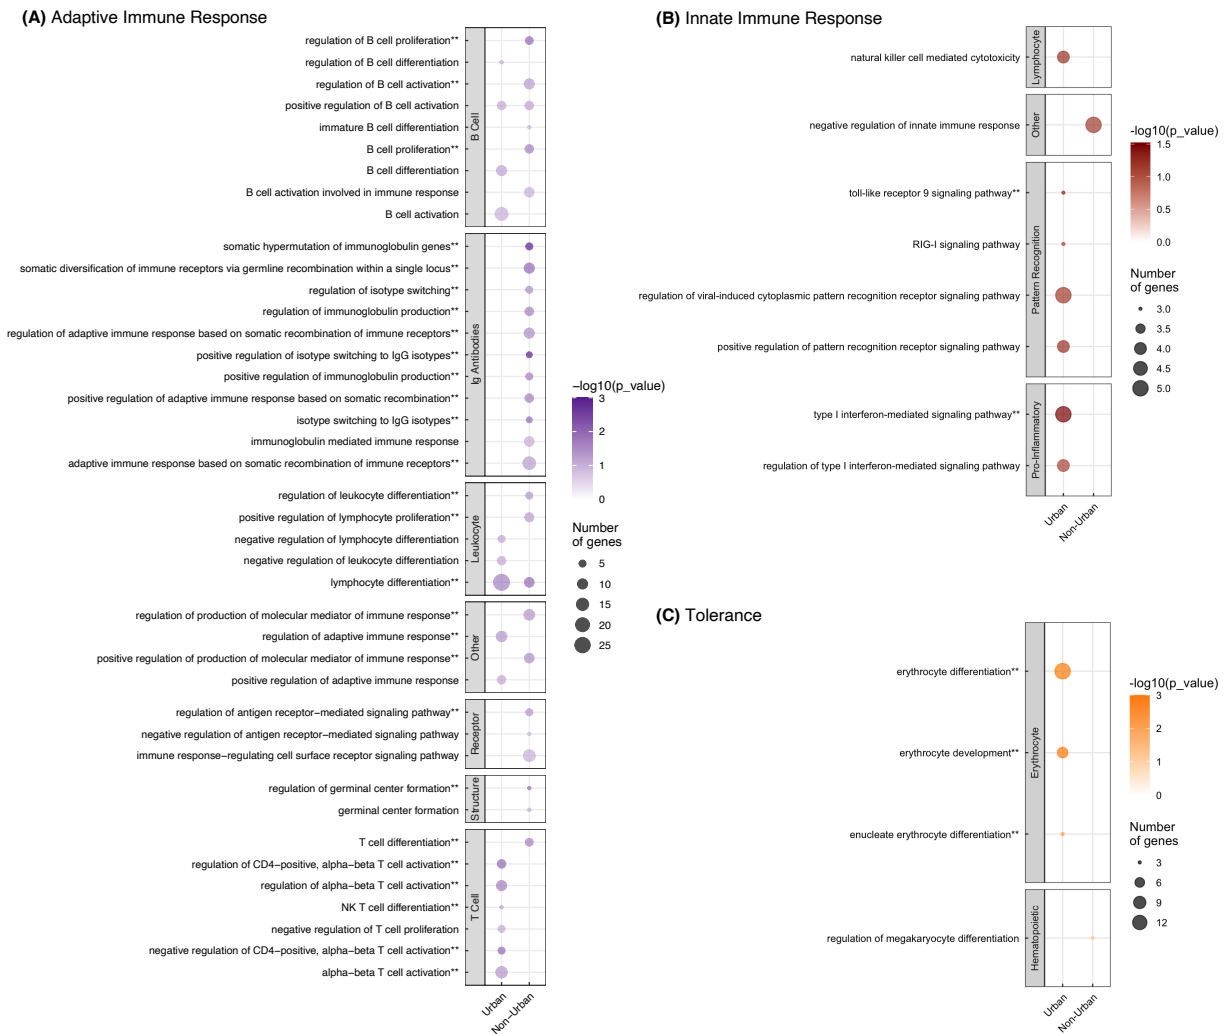

971

972

973

974

975

976

977

978

979

980 Fig. 5

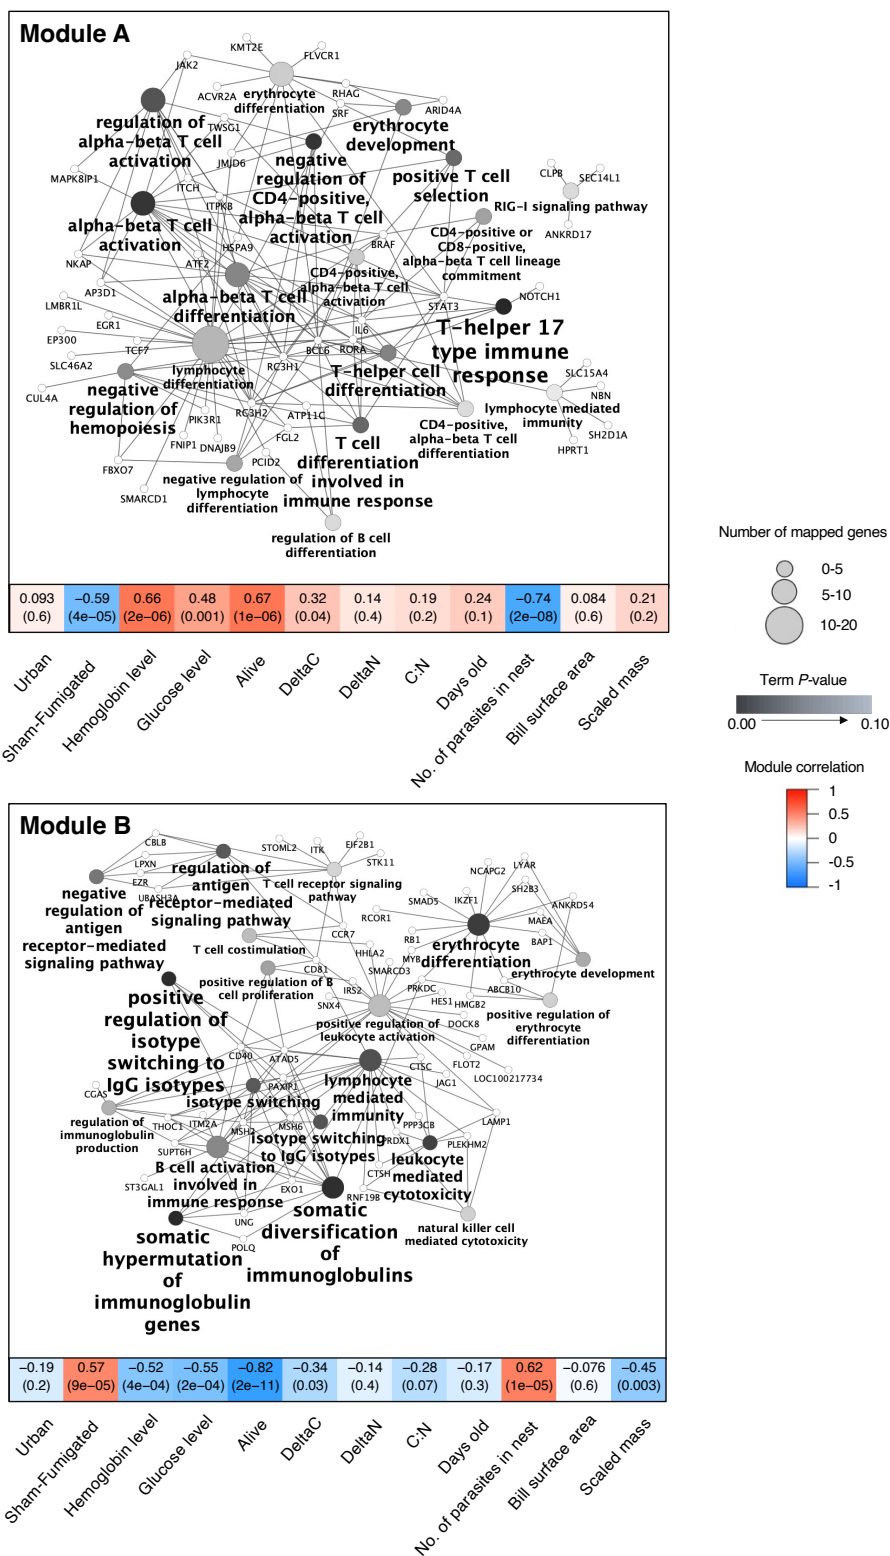

Source: https://www.biorxiv.org/content/10.1101/2023.03.06.531275v1.full.pdf
